# Supplementary material for: A New Proposal for Severity Evaluation of Menière's Disease by Using the Evidence From a Comprehensive Battery of Auditory and Vestibular Tests
Source: Front Neurol. 2020 Aug 18;11:785. doi: 10.3389/fneur.2020.00785 (PMC7461919; doi:10.3389/fneur.2020.00785)
Supplement: Supplementary file 1 [file Table_1.XLSX]

## Sheet: Sheet1
Data Summary
	DHI					Hearing loss		RCT		vHIT-G						VEMP
Subject	total	physical	emotion	function	#Vertigo	PTA	Hstage	0.08 Hz	State（0=Normal，1=abnormal）	A-SC	State（0=Normal，1=abnormal）	H-SC	State（0=Normal，1=abnormal）	P-SC	State（0=Normal，1=abnormal）	cVEMP	State（0=Normal，1=abnormal）	oVEMP	State（0=Normal，1=abnormal）	MD type		Subtype	HSC	Number of involved vestibular end organs		VEMP State（0=Normal，1=abnormal）	vHIT State（0=Normal，1=abnormal）	C label	S label	U label	D label	A label	H label	P label
1	74	20	32	22	4	21.6667	1	0.76	1	0.49	1	1.08	0	0.48	1	49.3	1	39.8	1	CSUD	7	AHP	1	5		1	1	C	S	U	D	A	H	P
2	38	10	4	24	4	8.33333	1	0.67	1	1.31	0	1.48	0	0.89	0	8.7	0	11.8	0	CD	4	H	1	1		0	0	C			D		H
3	38	10	24	4	5	13.3333	1	-	1	0.79	0	1.43	0	0.94	0	51	1	9.7	0	CSD	6	H	1	2		1	0	C	S		D		H
4	48	14	10	24	5	18.3333	1	0.23	1	0.74	0	1.43	0	0.69	1	100	1	15.8	0	CSD	6	HP	1	3		1	1	C	S		D		H	P
5	64	18	36	10	1	8.33333	1	0.69	1	0.87	0	1.09	0	1.09	0	2.9	0	89.8	1	CUD	5	H	1	2		1	0	C		U	D		H
6	0	0	0	0	0	15	1	-	0	1.18	0	1.05	0	0.81	0	54.7	1	35	1	CSU	3		0	2		1	0	C	S	U
7	14	2	6	6	3	35	2	0.52	1	0.81	0	0.88	0	0.77	0	0.2	0	4.9	0	CD	4	H	1	1		0	0	C			D		H
8	20	6	6	8	1	66.6667	3	0.61	0	0.94	0	1.02	0	0.81	0	1.7	0	15.4	0	C	1		0	0		0	0	C
9	54	16	8	30	9	63.3333	3	0.55	1	0.8	0	0.94	0	0.44	1	100	1	100	1	CSUD	7	HP	1	4		1	1	C	S	U	D		H	P
10	84	24	24	36	5	45	3	0.65	1	0.58	1	0.74	0	0.34	1	100	1	100	1	CSUD	7	AHP	1	5		1	1	C	S	U	D	A	H	P
11	60	16	12	32	3	60	3	-	1	0.93	0	1.16	0	0.95	0	30.5	1	28.1	0	CSD	6	H	1	2		1	0	C	S		D		H
12	58	16	8	34	1	50	3	0.79	1	0.58	1	1.32	0	0.92	0	10.9	0	100	1	CUD	5	AH	1	3		1	1	C		U	D	A	H
13	74	16	28	30	5	60	3	0.49	1	0.9	0	0.95	0	0.34	1	100	1	100	1	CSUD	7	HP	1	4		1	1	C	S	U	D		H	P
14	48	10	16	22	4	68.3333	3	0.63	1	0.72	0	1.3	0	0.8	0	100	1	100	1	CSUD	7	H	1	3		1	0	C	S	U	D		H
15	92	28	28	36	3	65	3	0.9	1	1.15	0	0.96	0	0.69	1	40	1	31.4	1	CSUD	7	HP	1	4		1	1	C	S	U	D		H	P
16	66	18	12	36	1	65	3	-	1	0.97	0	1.4	0	0.87	0	100	1	100	1	CSUD	7	H	1	3		1	0	C	S	U	D		H
17	48	14	16	18	4	91.6667	4	0.41	1	0.77	0	1.36	0	0.73	0	100	1	100	1	CSUD	7	H	1	3		1	0	C	S	U	D		H
18	50	8	18	24	6	81.6667	4	0.66	1	0.75	0	1.41	0	0.9	0	0.7	0	21.3	0	CD	4	H	1	1		0	0	C			D		H
19	90	28	32	30	4	30	2	0.44	1	0.98	0	1.24	0	0.92	0	30.8	1	1.9	0	CSD	6	H	1	2		1	0	C	S		D		H
20	38	16	6	16	5	45	3	0.57	1	0.2	1	0.58	1	0.43	1	20	0	0.8	0	CD	4	AHP	1	3		0	1	C			D	A	H	P
21	48	4	18	26	5	58.3333	3	0.4	1	0.5	1	1.15	0	0.76	0	35.5	1	34.7	1	CSUD	7	AH	1	4		1	1	C	S	U	D	A	H
22	30	20	8	2	5	30	2	0.4	1	0.49	1	0.82	0	0.48	1	26.3	0	10.9	0	CD	4	AHP	1	3		0	1	C			D	A	H	P
23	58	16	18	24	1	30	2	0.44	1	0.53	1	1.12	0	0.91	0	12.1	0	100	1	CUD	5	AH	1	3		1	1	C		U	D	A	H
24	48	20	10	18	4	61.6667	3	0.56	1	0.49	1	1.44	0	0.66	1	100	1	100	1	CSUD	7	AHP	1	5		1	1	C	S	U	D	A	H	P
25	52	16	6	30	6	33.3333	2	0.56	1	0.78	0	1.02	0	0.79	0	100	1	15.6	0	CSD	6	H	1	2		1	0	C	S		D		H
26	0	0	0	0	1	10	1	1	1	0.31	1	1.42	0	1	0	15.8	0	10	0	CD	4	AH	1	2		0	1	C			D	A	H
27	84	24	30	30	4	31.6667	2	0.63	1	0.92	0	1.61	0	0.7	0	34.6	1	100	1	CSUD	7	H	1	3		1	0	C	S	U	D		H
28	64	12	24	28	3	-3.33333	1	-	1	0.67	1	1.2	0	0.72	0	8.4	0	24.8	0	CD	4	AH	1	2		0	1	C			D	A	H
29	48	8	16	24	3	80	4	0.68	1	0.9	0	1.05	0	0.68	1	100	1	100	1	CSUD	7	HP	1	4		1	1	C	S	U	D		H	P
30	14	6	2	6	1	68.3333	3	0.58	1	0.54	1	0.29	0	0.78	0	30.8	1	12.2	0	CSD	6	AH	1	3		1	1	C	S		D	A	H
31	80	24	20	36	8	15	1	0.63	1	1.05	0	1.08	0	0.75	0	100	1	100	1	CSUD	7	H	1	3		1	0	C	S	U	D		H
32	60	16	8	36	4	50	3	0.48	1	0.94	0	1.43	0	0.32	1	34.7	1	6.6	0	CSD	6	HP	1	3		1	1	C	S		D		H	P
33	66	26	8	32	4	31.6667	2	-	1	0.53	1	1.51	0	1.04	0	97.7	1	30.1	1	CSUD	7	AH	1	4		1	1	C	S	U	D	A	H
34	26	10	6	10	1	60	3	0.61	1	0.85	0	1.14	0	0.79	0	23.8	0	2.1	0	CD	4	H	1	1		0	0	C			D		H
35	54	16	10	28	0	5	1	0.69	1	0.8	0	0.73	0	0.48	1	100	1	100	1	CSUD	7	HP	1	4		1	1	C	S	U	D		H	P
36	0	0	0	0	1	80	4	0.8	1	0.61	1	0.65	1	0.71	0	19.7	0	25.2	0	CD	4	AH	1	2		0	1	C			D	A	H
37	72	8	28	36	6	51.6667	3	-	1	0.48	1	0.96	0	0.89	0	35.5	1	48.4	1	CSUD	7	AH	1	4		1	1	C	S	U	D	A	H
38	20	4	8	8	4	45	3	0.86	1	0.83	0	1.39	0	0.96	0	11.9	0	39.1	1	CUD	5	H	1	2		1	0	C		U	D		H
39	56	16	20	20	2	61.6667	3	0.69	1	0.83	0	0.65	1	1.14	0	21.8	0	100	1	CUD	5	H	1	2		1	1	C		U	D		H
40	56	18	10	28	1	61.6667	3	0.51	1	0.42	1	1.15	0	0.85	0	100	1	11.1	0	CSD	6	AH	1	3		1	1	C	S		D	A	H
41	30	12	4	14	1	21.6667	1	0.26	1	0.66	1	0.96	0	0.56	1	10.9	0	23.8	0	CD	4	AHP	1	3		0	1	C			D	A	H	P
42	72	20	26	26	5	46.6667	3	-	1	0.4	1	1.07	0	0.76	0	32.2	1	5.7	0	CSD	6	AH	1	3		1	1	C	S		D	A	H
43	56	18	10	28	11	73.3333	4	0.46	1	0.66	1	1.3	0	0.61	1	100	1	100	1	CSUD	7	AHP	1	5		1	1	C	S	U	D	A	H	P
44	44	16	16	12	2	58.3333	3	0.55	1	0.67	0	1.63	0	0.71	0	0.8	0	14.6	0	CD	4	H	1	1		0	0	C			D		H
45	90	28	26	36	5	48.3333	3	-	1	0.97	0	1.4	0	0.82	0	100	1	100	1	CSUD	7	H	1	3		1	0	C	S	U	D		H
46	20	6	6	8	4	56.6667	3	-	1	0.75	0	1.33	0	0.65	1	14.8	0	8.4	0	CD	4	HP	1	2		0	1	C			D		H	P
47	80	22	22	36	12	23.3333	1	-	1	0.51	1	1.36	0	0.69	1	100	1	39.8	1	CSUD	7	AHP	1	5		1	1	C	S	U	D	A	H	P
48	50	16	14	20	5	51.6667	3	0.88	1	0.85	0	0.93	0	0.63	1	100	1	31	1	CSUD	7	HP	1	4		1	1	C	S	U	D		H	P
49	50	16	8	26	4	48.3333	3	-	1	0.26	1	1.09	0	0.97	0	18.5	0	14.6	0	CD	4	AH	1	2		0	1	C			D	A	H
50	92	28	28	36	21	88.3333	4	0.56	1	0.53	1	1.32	0	1.06	0	34.6	1	25.5	0	CSD	6	AH	1	3		1	1	C	S		D	A	H
51	52	12	4	36	5	40	2	0.5	1	0.75	0	0.99	0	0.67	1	100	1	100	1	CSUD	7	HP	1	4		1	1	C	S	U	D		H	P
52	84	20	28	36	5	23.3333	1	-	1	0.48	1	0.59	1	0.61	1	67.1	1	40	1	CSUD	7	AHP	1	5		1	1	C	S	U	D	A	H	P
53	36	10	10	16	2	38.3333	2	0.75	1	0.92	0	1	0	0.89	0	28.1	0	26	0	CD	4	H	1	1		0	0	C			D		H
54	52	26	18	8	3	63.3333	3	0.23	1	0.81	0	1.06	0	0.77	0	46	1	56.3	1	CSUD	7	H	1	3		1	0	C	S	U	D		H
55	42	12	4	26	3	58.3333	3	0.8	1	0.54	1	0.8	0	0.47	1	7	0	100	1	CUD	5	AHP	1	4		1	1	C		U	D	A	H	P
56	64	18	10	36	5	30	2	0.62	1	0.65	1	0.8	0	0.47	1	32.5	1	10	0	CSD	6	AHP	1	4		1	1	C	S		D	A	H	P
57	42	12	15	15	1	91.6667	4	0.84	0	0.75	0	0.68	1	0.65	1	21	0	13	0	CD	4	HP	1	2		0	1	C			D		H	P
58	56	12	36	8	3	55	3	0.75	1	0.75	0	1.24	0	0.67	1	2	0	5	0	CD	4	HP	1	2		0	1	C			D		H	P
59	44	8	8	28	2	33.3333	2	1.44	1	1.07	0	0.79	1	0.54	1	6	0	7	0	CD	4	HP	1	2		0	1	C			D		H	P
60	50	14	18	18	6	61.6667	3	0.85	1	0.87	0	0.86	0	0.73	0	38	1	51	1	CSUD	7	H	1	3		1	0	C	S	U	D		H
61	40	12	24	4	4	38.3333	2	-	1	0.76	0	1.01	0	0.77	0	8.9	0	19.1	0	CD	4	H	1	1		0	0	C			D		H
62	30	6	6	18	8	43.3333	3	0.71	1	0.7	0	0.92	0	0.54	1	25.2	0	2.9	0	CD	4	HP	1	2		0	1	C			D		H	P
63	46	12	32	2	5	93.3333	4	-	1	0.9	0	0.98	0	0.89	0	8	0	18.7	0	CD	4	H	1	1		0	0	C			D		H
64	48	14	16	18	6	70	3	0.44	1	0.92	0	0.93	0	0.91	0	7.8	0	44.8	1	CUD	5	H	1	2		1	0	C		U	D		H
65	62	18	36	8	3	76.6667	4	0.61	1	0.8	0	0.98	0	0.75	0	27.1	0	6.3	0	CD	4	H	1	1		0	0	C			D		H
66	26	8	16	2	5	63.3333	3	0.72	1	0.75	0	1.11	0	0.71	0	36	1	70	1	CSUD	7	H	1	3		1	0	C	S	U	D		H
67	44	20	22	2	8	88.3333	4	0.65	1	0.54	1	0.8	0	0.47	1	7	0	9	0	CD	4	AHP	1	3		0	1	C			D	A	H	P
68	52	14	30	8	11	33.3333	2	0.18	1	0.81	0	1.06	0	0.77	0	58.1	1	46	1	CSUD	7	H	1	3		1	0	C	S	U	D		H
69	46	8	10	28	2	53.3333	3	1.12	1	0.9	0	1.03	0	0.82	0	22	0	52	1	CUD	5	H	1	2		1	0	C		U	D		H
70	52	14	6	32	3	73.3333	4	-	1	0.78	0	1.08	0	0.85	0	19.6	0	29.5	1	CUD	5	H	1	2		1	0	C		U	D		H
71	38	10	6	22	6	31.6667	2	0.65	1	0.86	0	1	0	0.92	0	23.7	0	28.9	0	CD	4	H	1	1		0	0	C			D		H
72	52	10	36	6	7	18.3333	1	0.77	0	0.97	0	1.14	0	0.94	0	5.2	0	63.8	1	CU	2		0	1		1	0	C		U
73	20	10	6	4	8	6.66667	1	0.42	1	0.76	0	0.67	1	0.82	0	33	1	17	0	CSD	6	H	1	2		1	1	C	S		D		H
74	42	12	8	22	8	16.6667	1	-	1	0.94	0	1.45	0	0.66	1	4.4	0	10.4	0	CD	4	HP	1	2		0	1	C			D		H	P
75	42	12	12	18	4	25	1	-	1	0.63	1	0.99	0	0.88	0	45.5	1	16.6	0	CSD	6	AH	1	3		1	1	C	S		D	A	H
76	28	8	18	2	8	66.6667	3	-	1	0.79	0	1.13	0	1.1	0	21.3	0	7.1	0	CD	4	H	1	1		0	0	C			D		H
77	44	12	30	2	5	18.3333	1	-	1	0.68	0	0.57	0	0.5	0	24.9	0	8.7	0	CD	4	H	1	1		0	0	C			D		H
78	72	20	18	34	12	13.3333	1	-	1	0.7	0	1.08	0	0.56	1	50.4	1	42	1	CSUD	7	HP	1	4		1	1	C	S	U	D		H	P
79	62	18	8	36	10	33.3333	2	-	1	0.62	1	1.29	0	0.9	0	100	1	18.4	0	CSD	6	AH	1	3		1	1	C	S		D	A	H
80	84	24	24	36	9	36.6667	2	-	1	0.61	1	0.61	1	0.34	1	39.9	1	14.9	0	CSD	6	AHP	1	4		1	1	C	S		D	A	H	P

## Sheet: Sheet2
2	3.4		2.59541
6	3.87		4.07978
8	4.47473		5.18269				7		2
2	8.61264		9.10782				8		2
10	-1.90209		-0.866236				0		1
2	8.98792		9.46381				6		2
10	-2.18825		-1.13768				1.30585		15
6	4.98659		5.66823				0.429479		2
6	-0.524025		0.440967				5		3
5	4.36732		5.0808				2.37169		2
9	-5.9312		-4.68817				11		3
2	1.36028		2.22838				1.79885		2
3	2.36998		3.18616				3.83169		2
7	-4.09073		-2.94233				6.65492		1
6	-1.89002		-0.854784				1.63714		2
5	2.69058		3.49028				0.766439		1
2	-4.49589		-3.32666				2.5636		2
8	1.47441		2.33664				0		2
1	7.06049		7.63549				0		4
3	2.39728		3.21206				0		2
3	5.21836		5.88808				3.12699		17
2	8.72927		9.21847				0		1
6	3.5644		4.31917				5		1
7	6.47633		7.08137				2.21125		3
3	2.03084		2.86446				1.85469		4
5	3.44413		4.20508				1.53293		5
2	6.77915		7.36862				6.38979		4
3	3.4781		4.2373				10		0
2			3.4				3.4029		0
9			3.87				3.16091		6
4									4
1									3
8									1
5									1
									4
									4
									1
									8
									0
									5
									5
									5
									1
									5
									4
									3
									2
									0
									3
									1
									2
									1
									1
									5
									1
									21
									5
									3.4
									3.87345
